# Supplementary material for: Molecular characterization and clinical outcome of B-cell precursor acute lymphoblastic leukemia with IG-MYC rearrangement
Source: PubMed Central journal article supplement — Haematologica. 2022 Apr 28;108(3):717–31. doi: 10.3324/haematol.2021.280557 (PMC9973471; doi:10.3324/haematol.2021.280557), 2022-04-28
Supplement: 2021_280557_BOMKEN_SUPPL.pdf [file 2021_280557_BOMKEN_SUPPL.pdf]

# Molecular characterization and clinical outcome of B-cell precursor acute lymphoblastic leukemia with *IG-MYC* rearrangement

Simon Bomken,<sup>1,2\*</sup> Amir Enshaei,<sup>1</sup> Edward C. Schwalbe,<sup>3</sup> Aneta Mikulasova,<sup>4</sup> Yunfeng Dai,<sup>5</sup> Masood Zaka,<sup>6,7</sup> Kent T.M. Fung,<sup>1</sup> Matthew Bashton,<sup>8</sup> Huezin Lim,<sup>1</sup> Lisa Jones,<sup>1</sup> Nefeli Karataraki,<sup>1,4</sup> Emily Winterman,<sup>1</sup> Cody Ashby,<sup>9</sup> Andishe Attarbaschi,<sup>10</sup> Yves Bertrand,<sup>11</sup> Jutta Bradtke,<sup>12</sup> Barbara Buldini,<sup>13</sup> G.A. Amos Burke,<sup>14</sup> Giovanni Cazzaniga,<sup>15,16</sup> Gudrun Göhring,<sup>17</sup> Hesta A. de Groot-Kruseman,<sup>18,19</sup> Claudia Haferlach,<sup>20</sup> Luca Lo Nigro,<sup>21</sup> Mayur Parihar,<sup>22</sup> Adriana Plesa,<sup>23</sup> Emma Seaford,<sup>24</sup> Edwin Sonneveld,<sup>19</sup> Sabine Strehl,<sup>25</sup> Vincent H.J. van der Velden,<sup>26</sup> Vikki Rand,<sup>6,7</sup> Stephen P. Hunger,<sup>27</sup> Christine J. Harrison,<sup>1</sup> Chris M. Bacon,<sup>1,2</sup> Frederik W. van Delft,<sup>1,2</sup> Mignon L. Loh,<sup>28</sup> John Moppett,<sup>24</sup> Josef Vormoor,<sup>1,19°</sup> Brian A. Walker,<sup>29</sup> Anthony V. Moorman<sup>1</sup> and Lisa J. Russell<sup>1,4\*</sup>

<sup>1</sup>Wolfson Childhood Cancer Centre, Translational and Clinical Research Institute, Newcastle University, Newcastle upon Tyne, UK; <sup>2</sup>The Great North Children's Hospital, Newcastle upon Tyne Hospitals NHS Foundation Trust, Newcastle upon Tyne, UK; <sup>3</sup>Department of Applied Sciences, Northumbria University, Newcastle upon Tyne, UK; <sup>4</sup>Biosciences Institute, Newcastle University, Newcastle upon Tyne, UK; <sup>5</sup>Department of Biostatistics, Colleges of Medicine, Public Health and Health Professions, University of Florida, Gainesville, FL, USA; <sup>6</sup>School of Health and Life Sciences, Teesside University, Middlesbrough, UK; <sup>7</sup>National Horizons Centre, Teesside University, Darlington, UK; <sup>8</sup>The Hub for Biotechnology in the Built Environment, Faculty of Health and Life Sciences, Northumbria University, Newcastle upon Tyne, UK; <sup>9</sup>Department of Biomedical Informatics / Cancer Institute, University of Arkansas for Medical Sciences, Little Rock, AR, USA; <sup>10</sup>St Anna Children's Hospital, Medical University of Vienna, Vienna, Austria; <sup>11</sup>Department of Institute of Hematology Oncology Pediatric (IHOP), Hospices Civils de Lyon, Lyon, France; <sup>12</sup>Institute of Pathology, Department Cytogenetics, University Hospital Giessen and Marburg, Giessen, Germany; <sup>13</sup>Maternal and Child Health Department, Padua University, Padua Italy; <sup>14</sup>Department of Paediatric Haematology, Oncology, and Palliative Care, Cambridge University Hospitals NHS Foundation Trust, Addenbrooke's Hospital, Cambridge, UK; <sup>15</sup>School of Medicine and Surgery, University of Milano-Bicocca, Monza, Italy; <sup>16</sup>Centro Ricerca Tettamanti, University of Milano-Bicocca, Monza, Italy; <sup>17</sup>Department of Human Genetics, Hannover Medical School, Hannover, Germany; <sup>18</sup>Dutch Childhood Oncology Group (DCOG), Utrecht, the Netherlands; <sup>19</sup>Princess Máxima Center for Pediatric Oncology, Utrecht, the Netherlands; <sup>20</sup>MLL Munich Leukemia Laboratory, Munich, Germany; <sup>21</sup>Cytogenetic-Cytofluorimetric-Molecular Biology Laboratory, Center of Pediatric Hematology Oncology, Azienda Policlinico "G. Rodolico - San Marco", Catania, Italy; <sup>22</sup>Department of Cytogenetics and Laboratory Haematology, Tata Medical Centre, Kolkata, India; <sup>23</sup>Hematology and Flow cytometry Laboratory, Lyon Sud University Hospital, Hospices Civils de Lyon, Lyon, France; <sup>24</sup>Department of Paediatric Oncology, Bristol Royal Hospital for Children, Bristol, UK; <sup>25</sup>St. Anna Children's Cancer Research Institute (CCRI), Vienna, Austria; <sup>26</sup>Department of Immunology, Erasmus MC, University Medical Center Rotterdam, Rotterdam, the Netherlands; <sup>27</sup>Department of Pediatrics and the Center for Childhood Cancer Research, Children's Hospital of Philadelphia and the Perelman School of Medicine, University of Pennsylvania, Philadelphia, PA, USA; <sup>28</sup>Department of Pediatrics, Benioff Children's Hospital and the Helen Diller Family Comprehensive Cancer Center, University of California, San Francisco, CA, USA and <sup>29</sup>Melvin and Bren Simon Comprehensive Cancer Center, Division of Hematology Oncology, Indiana University, Indianapolis, IN, USA

\*SB and LJR contributed equally to this work.

°current address University Medical Center Utrecht, Utrecht, the Netherlands

**Correspondence:** L.J. Russell  
[lisa.russell@newcastle.ac.uk](mailto:lisa.russell@newcastle.ac.uk)

S. Bomken  
[s.n.bomken@newcastle.ac.uk](mailto:s.n.bomken@newcastle.ac.uk)

**Received:** January 6, 2022.

**Accepted:** March 31, 2022.

**Early view:** April 28, 2022.

<https://doi.org/10.3324/haematol.2021.280557>

©2023 Ferrata Storti Foundation

Published under a CC BY license

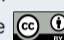

***Molecular characterisation and clinical outcome of B-cell precursor acute lymphoblastic leukaemia with IG-MYC rearrangement***

Simon Bomken<sup>1,2</sup>, Amir Enshaei<sup>1</sup>, Edward C Schwalbe<sup>3</sup>, Aneta Mikulasova<sup>4</sup>, Yunfeng Dai<sup>5</sup>, Masood Zaka<sup>6,7</sup>, Kent TM Fung<sup>1</sup>, Matthew Bashton<sup>8</sup>, Huezin Lim<sup>1</sup>, Lisa Jones<sup>1</sup>, Nefeli Karataraki<sup>1</sup>, Emily Winterman<sup>1</sup>, Cody Ashby<sup>9</sup>, Andishe Attarbaschi<sup>10</sup>, Yves Bertrand<sup>11</sup>, Jutte Bradtke<sup>12</sup>, Barbara Buldini<sup>13</sup>, GA Amos Burke<sup>14</sup>, Giovanni Cazzaniga<sup>15,16</sup>, Gudrun Göhring<sup>17</sup>, Hesta A de Groot-Kruseman<sup>18,19</sup>, Claudia Haferlach<sup>20</sup>, Luca Lo Nigro<sup>21</sup>, Mayur Parihar<sup>22</sup>, Adriana Plesa<sup>23</sup>, Emma Seaford<sup>24</sup>, Edwin Sonneveld<sup>19</sup>, Sabine Strehl<sup>25</sup>, Vincent HJ van der Velden<sup>26</sup>, Vikki Rand<sup>6,7</sup>, Stephen P Hunger<sup>27</sup>, Christine J Harrison<sup>1</sup>, Chris M Bacon<sup>1,2</sup>, Frederik W van Delft<sup>1,2</sup>, Mignon L Loh<sup>28</sup>, John Moppett<sup>24</sup>, Josef Vormoor<sup>1,19</sup>, Brian A Walker<sup>29</sup>, Anthony V Moorman<sup>1</sup>, Lisa J Russell<sup>1</sup>

<sup>1</sup>Wolfson Childhood Cancer Centre, Translational and Clinical Research Institute, Newcastle University, Newcastle upon Tyne, United Kingdom

<sup>2</sup>The Newcastle upon Tyne Hospitals NHS Foundation Trust, Newcastle upon Tyne, UK

<sup>3</sup>Department of Applied Sciences, Northumbria University, Newcastle upon Tyne, UK

<sup>4</sup>Biosciences Institute, Newcastle University, Newcastle upon Tyne, UK

<sup>5</sup>Department of Biostatistics, Colleges of Medicine, Public Health and Health Professions, University of Florida, Gainesville, Florida, USA

<sup>6</sup>School of Health and Life Sciences, Teesside University, Middlesbrough, UK

<sup>7</sup>National Horizons Centre, Teesside University, Darlington, UK

<sup>8</sup>The Hub for Biotechnology in the Built Environment, Faculty of Health and Life Sciences, Northumbria University, Newcastle upon Tyne, UK

<sup>9</sup>Department of Biomedical Informatics / Cancer Institute, University of Arkansas for Medical Sciences, Little Rock, Arkansas, USA

<sup>10</sup>St Anna Children's Hospital, Medical University of Vienna, Vienna, Austria

<sup>11</sup>Department of Institute of Hematology Oncology Pediatric (IHOP), Hospices Civils de Lyon, Lyon, France

<sup>12</sup>Institute of Pathology, Department Cytogenetics, University Hospital Giessen and Marburg, Giessen

<sup>13</sup>University of Padova, Padova, Veneto, Italy

<sup>14</sup>Department of Paediatric Haematology, Oncology, and Palliative Care, Cambridge University Hospitals NHS Foundation Trust, Addenbrooke's Hospital, Cambridge, UK

<sup>15</sup>School of Medicine and Surgery, University of Milano-Bicocca, Milan, Italy

<sup>16</sup>Centro Ricerca Tettamanti, University of Milano-Bicocca, Milan, Italy

<sup>17</sup>Department of Human Genetics, Hannover Medical School, Hannover, Germany

<sup>18</sup>Dutch Childhood Oncology Group (DCOG), Utrecht, The Netherlands

<sup>19</sup>Princess Máxima Center for Pediatric Oncology, Utrecht, The Netherlands

<sup>20</sup>MLL Munich Leukemia Laboratory, Munich, Germany

<sup>21</sup>Head of Cytogenetic-Cytofluorimetric-Molecular Biology Laboratory, Center of Pediatric Hematology Oncology, Azienda Policlinico "G. Rodolico - San Marco," Catania, Italy

<sup>22</sup>Department of Cytogenetics and Laboratory Haematology, Tata Medical Centre, Kolkata, India

<sup>23</sup>Hematology and Flow cytometry Laboratory, Lyon Sud University Hospital, Hospices Civils de Lyon, Lyon, France

<sup>24</sup>Department of Paediatric Oncology, Bristol Royal Hospital for Children, Bristol, UK

<sup>25</sup>St. Anna Children's Cancer Research Institute, Vienna, Austria

<sup>26</sup>Department of Immunology, Erasmus MC, University Medical Center Rotterdam, Rotterdam, The Netherlands

<sup>27</sup>Department of Pediatrics and the Center for Childhood Cancer Research, Children's Hospital of Philadelphia and the Perelman School of Medicine, University of Pennsylvania, Philadelphia, Pennsylvania, USA

<sup>28</sup>Department of Pediatrics, Benioff Children's Hospital and the Helen Diller Family Comprehensive Cancer Center, University of California, San Francisco, California, USA

<sup>29</sup>Melvin and Bren Simon Comprehensive Cancer Center, Division of Hematology Oncology, Indiana University, Indianapolis, Indiana, USA

## Contents

|                                                                                                                                                                                                                                                                                                                                                                        |    |
|------------------------------------------------------------------------------------------------------------------------------------------------------------------------------------------------------------------------------------------------------------------------------------------------------------------------------------------------------------------------|----|
| <b>Supplementary Methods</b>                                                                                                                                                                                                                                                                                                                                           | 4  |
| Conventional cytogenetics and fluorescence <i>in situ</i> hybridisation                                                                                                                                                                                                                                                                                                | 4  |
| Whole exome sequencing                                                                                                                                                                                                                                                                                                                                                 | 4  |
| Data analysis                                                                                                                                                                                                                                                                                                                                                          | 4  |
| Illumina Infinium MethylationEPIC BeadChip array                                                                                                                                                                                                                                                                                                                       | 5  |
| RNA-sequencing                                                                                                                                                                                                                                                                                                                                                         | 5  |
| <b>Supplementary Table Legends</b>                                                                                                                                                                                                                                                                                                                                     | 6  |
| <b>Supplementary Figures</b>                                                                                                                                                                                                                                                                                                                                           | 7  |
| Supplementary Figure 1. Consort diagram for the genetic characterisation and survival analysis of patients with BCP-ALL and <i>IG-MYC-r</i> .                                                                                                                                                                                                                          | 7  |
| Supplementary Figure 2. Percentage of blasts carrying <i>IG-MYC-r</i> grouped by immunoglobulin chain involvement. Red dots - patients with concomitant BCL2/BCL6-r. Green dots - patients with concomitant ALL-specific abnormality. Blue dots - patient with <i>IG-MYC-r</i> as the defining cytogenetic abnormality. Dotted and dashed lines, interquartile ranges. | 8  |
| Supplementary Figure 3. Lollipop plots for common BL mutations. ID3 (upper panel) and TCF3 (lower panel) in Burkitt lymphoma samples (black circles, Newman <i>et al</i> <sup>5</sup> ) and BCP-ALL samples from this study (red circles).                                                                                                                             | 9  |
| Supplementary Figure 4. Venn diagram of the key molecular features identified within children with <i>IG-MYC-r</i> BCP-ALL.                                                                                                                                                                                                                                            | 10 |
| <b>Supplementary References</b>                                                                                                                                                                                                                                                                                                                                        | 11 |

## Supplementary Methods

### Conventional cytogenetics and fluorescence *in situ* hybridisation

Briefly, *IGH* (CytoCell (Oxford Gene Technologies, Begbroke, Oxfordshire, UK) *IGH* breakapart, Vysis (Abbott Laboratories, Abbott Park, Illinois, U.S.A) LSI *IGH* Dual Color, Break Apart Rearrangement Probe), *MYC* (CytoCell *MYC* breakapart, Vysis *MYC* Dual Color, Break Apart Rearrangement Probe), *BCL2* (CytoCell *BCL2* breakapart) and *BCL6* (CytoCell *BCL6* breakapart) fluorescence *in situ* hybridisation (FISH) probes were mixed 1:1 with hybridisation buffer and denatured at 75°C for five minutes followed by hybridisation at 37°C overnight. Slides were washed for two-minutes in 0.02% SSC with 0.003% NP40 at 72°C followed by two minute room temperature incubation in 0.1% SSC. Slides were mounted with 10µl DAPI (Vector laboratories, California, USA). Manual visualisation and scoring were performed using an Olympus BX-61 fluorescence microscope with a x100 oil objective (Leica Microsystems, Gateshead, UK). Where possible, more than 100 interphase nuclei were scored for each FISH test by two independent analysts. A cut-off threshold of >5% was used for all probes to allow for interference and obscuring of signals (false positives). This cut-off level was established by counting the number of abnormal signals generated when the FISH probes were hybridised to normal cells.

### Whole exome sequencing

#### Data analysis

Quality reports were generated using Java base tool FastQC (Babraham Bioinformatics, Cambridge, UK) and read pairs were mapped to human genome reference (hg19) (<ftp://ftp.broadinstitute.org/bundle/hg19/>), using default settings from BWA-MEM (Burrows-Wheel Aligner, 0.7.17-r1188 version). Broad Institute best practices PICARD (2.19.0 version, <https://broadinstitute.github.io/picard/>) tools were applied for the pre-processing (merging the read groups, coordinate sorting, marking duplicates and correction of technical biases) of aligned bam files.

SNVs and Indels in tumour samples were identified using an in-house NGS data analysis pipeline. A separate analysis was run for the generation of a panel of normal (PON) from high quality 61 constitutional/normal exome samples generated using the same exome preparation methods, software and sequencing technologies to capture recurrent technical artefacts in order to improve the results of the somatic variant calling. Initial genomics variants for SNVs were identified using tumour only algorithm of MuTect2 caller of GATK (Genome Analysis Tool Kit, version 3.8), followed by extensive review of corresponding genomic positions in the PON database built in the previous step. Variant call sets were filtered after calculating the new quality scores using the VQSR (variant quality score recalibration) method. All putative somatic variants were annotated using Ensembl Variant Effect Predictor (VEP, version 90). Candidate variants

coding for synonymous consequences and allelic frequency > 1% in gnomAD (version 2.1) were discarded from further analysis.

Due to the absence of paired constitutional DNA samples, we took a targeted approach to identify common BCP-ALL and BL mutations. Genes included in the BCP-ALL panel were *ANK3*, *ARID1A*, *ASMTL*, *ASXL3*, *ATM*, *ATRX*, *BIRC6*, *CBL*, *CBLB*, *CHD4*, *CREBBP*, *CSF3R*, *CTCF*, *EBF1*, *EP300*, *ERG*, *ETV6*, *FAT1*, *FAT2*, *FAT4*, *FBXW7*, *FLT3*, *IKZF1*, *IKZF2*, *IKZF3*, *IL7R*, *JAK1*, *JAK2*, *JAK3*, *KAT6B*, *KDM6A*, *KIT*, *KRAS*, *KMT2A*, *KMT2B*, *KMT2C*, *NCL*, *NF1*, *NOTCH2*, *NRAS*, *PAX5*, *PDGFRA*, *PTPN11*, *RUNX1*, *RUNX2*, *SEMA7A*, *SF3B1*, *TET1*, *TET2*, *TP53*, *TUSC3*, *WHSC1*, *WT1* and *ZEB2*. Genes included in the BL panel were *FOXO1*, *MYC*, *ID3*, *TP53*, *DDX3X*, *TCF3*, *SMARCA4*, *GNA13*, *CCND3*, *ARID1A*, *RET*, *RHOA*, *PIK3R1*, *KMT2C*, *KMT2D* and *PTEN*.

### **Illumina Infinium MethylationEPIC BeadChip array**

Briefly, 250ng dsDNA from 17 patients was hybridised to the Illumina Infinium MethylationEPIC BeadChip Array (Illumina, San Diego, CA, USA) by Eurofins Genomics (Ebersberg, Germany). DNA was treated with sodium bisulfite using the EZ-96 DNA methylation kit (Zymo Research, Irvine, CA, USA). The bisulfite-treated DNA was analysed using the manual Illumina Infinium HD.

Methylation assay according to manufacturer's guidelines. The BeadChip was scanned with both red (Cy5) and green (Cy3) laser on an iScan instrument with the iScan Control software (Illumina) determining intensity values for each bead type. The data was analysed using Illumina's Genomestudio software. Data were quality controlled and normalised as previously reported<sup>1</sup>. We augmented this data with additional publicly available methylation array data (Supplementary Table 3).

### **RNA-sequencing**

RNA integrity was assessed using the Bioanalyser with RIN scores >6 being included. 500ng of RNA was used to prepare RNA strand-specific libraries using TruSeq Stranded mRNA Library Prep Kit (Illumina) according to the manufacturer's instructions. For sequencing, pooled libraries were loaded on the cBot (Illumina) and cluster generation was performed using manufacturer's instructions. Paired-end sequencing using 100bp read length was performed on a HiSeq2500 machine (HiSeq Control Software 2.2.58) using HiSeq Flow Cell v4 and TruSeq SBS Kit v4. For processing of raw data RTA version 1.18.64 and CASAVA 1.8.4 was used to generate FASTQ-files. Data were quantified by kallisto<sup>2</sup>. The estimated counts were transformed using voom from the limma R package<sup>3</sup> and batch effect was corrected by permuted SVA<sup>4</sup>.

## Supplementary Table Legends

Supplementary Table 1. Supplementary Table 1. Patient cohort demographic, clinical and cytogenetic characteristics

Supplementary Table 2. Immunophenotype data collected from patients with IG-MYC-r

Supplementary Table 3. Publicly available methylation array datasets used in our analysis

Supplementary Table 4. Detail of translocations involving immunoglobulin and/or MYC genes detected by targeted sequencing

Supplementary Table 5. Univariate analysis of the key molecular features identified in children and adults with IG-MYC (excluding those with BCL2/6-r and established ALL-specific rearrangements).

Supplemental tables provided as excel files

**Supplementary Figures**

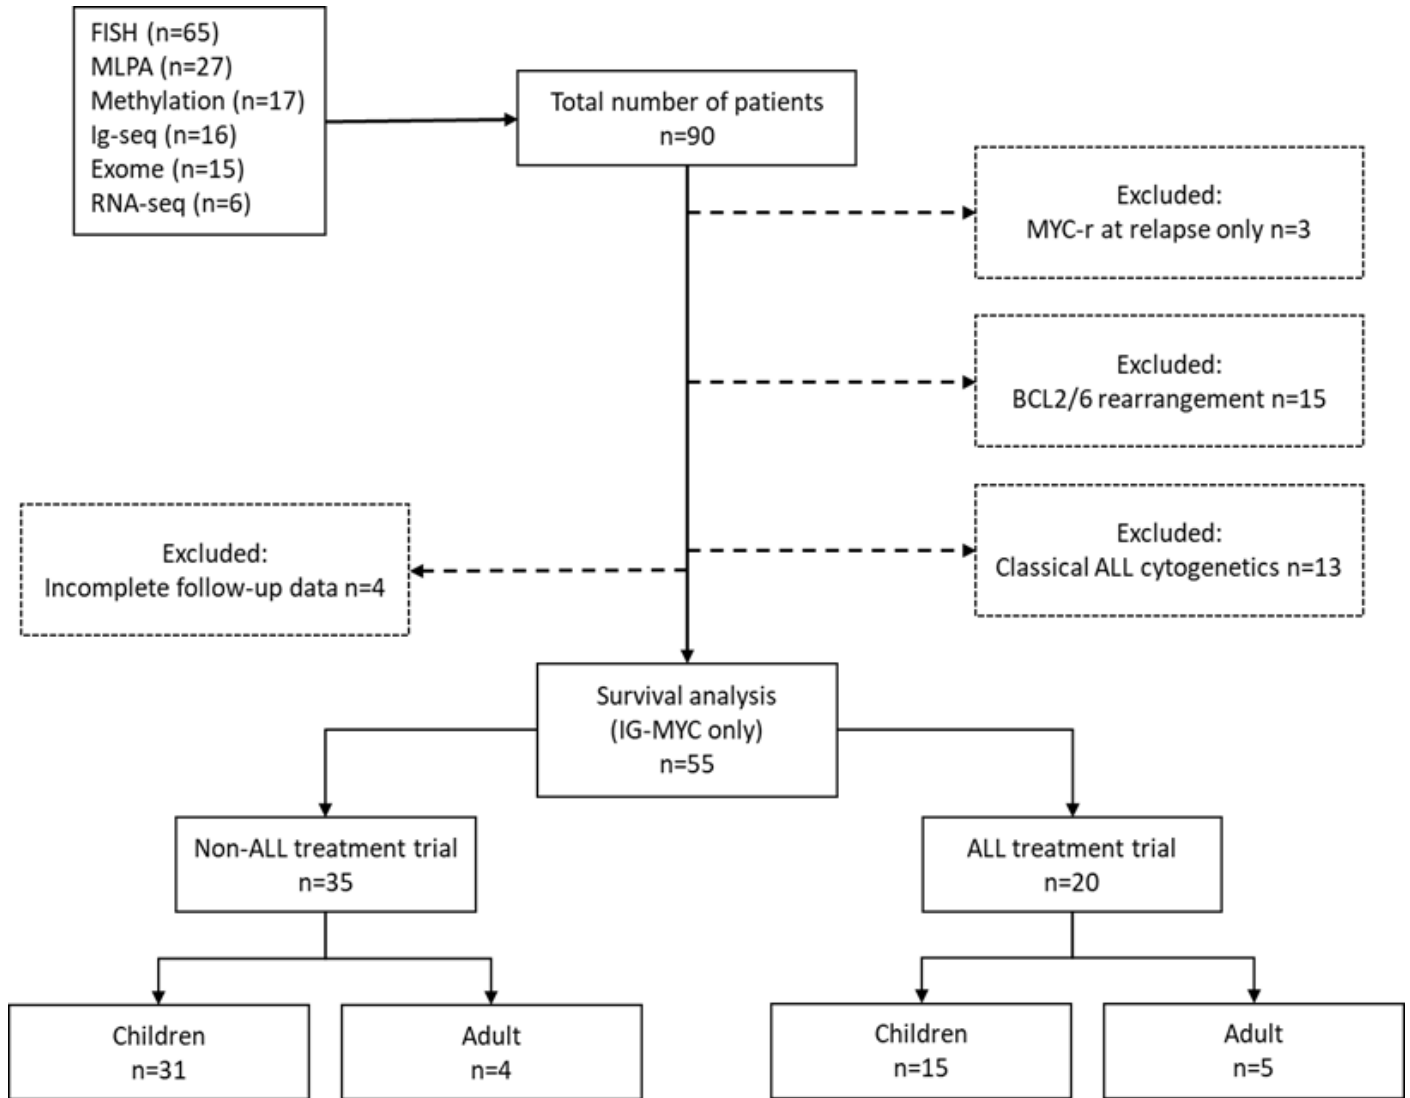

**Supplementary Figure 1.** Consort diagram for the genetic characterisation and survival analysis of patients with BCP-ALL and *IG-MYC-r*.



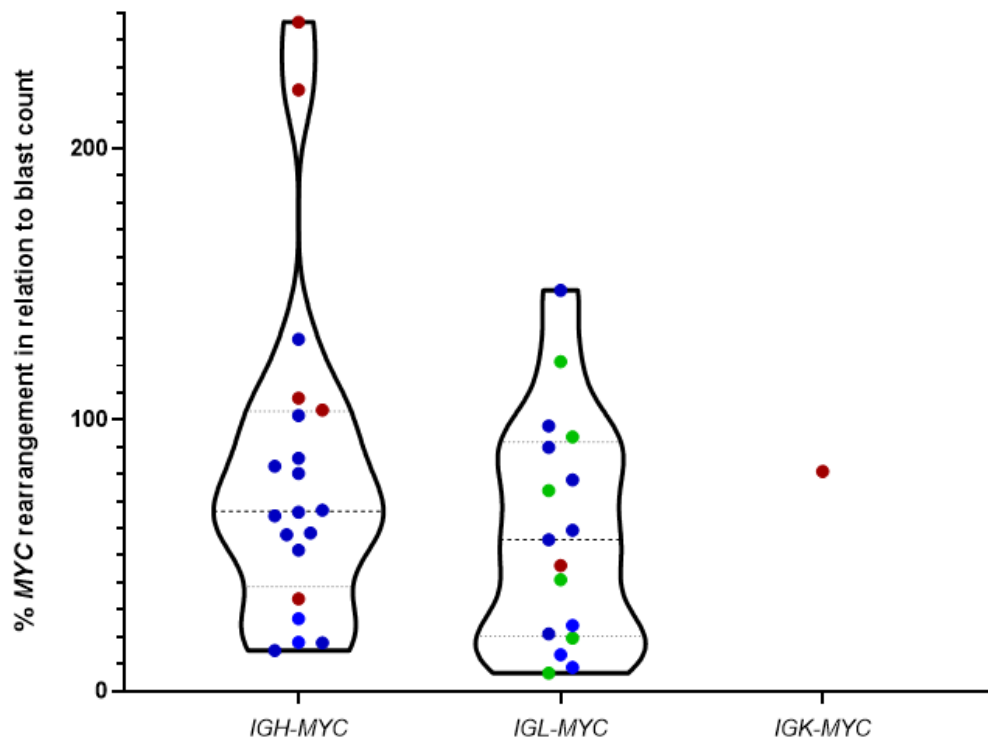

**Supplementary Figure 2. Percentage of blasts carrying *IG-MYC-r* grouped by immunoglobulin chain involvement.** Red dots - patients with concomitant BCL2/BCL6-r. Green dots - patients with concomitant ALL-specific abnormality. Blue dots - patient with *IG-MYC-r* as the defining cytogenetic abnormality. Dotted and dashed lines, interquartile ranges.

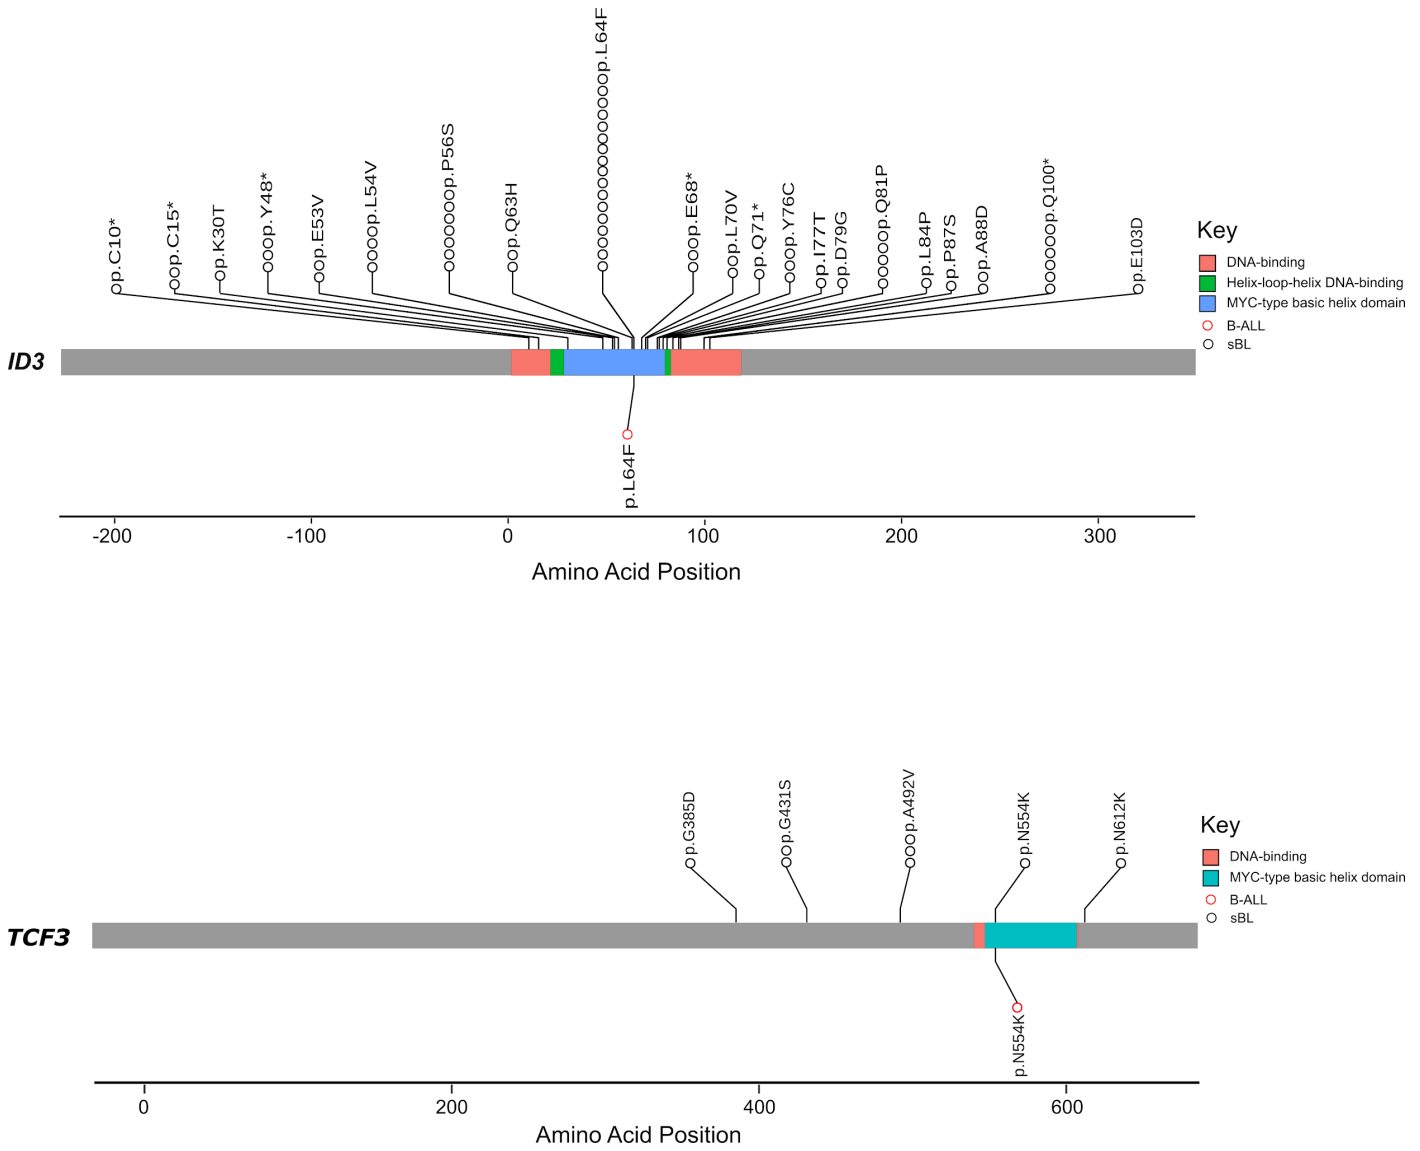

**Supplementary Figure 3. Lollipop plots for common BL mutations.** ID3 (upper panel) and TCF3 (lower panel) in Burkitt lymphoma samples (black circles, Newman *et al*<sup>5</sup>) and BCP-ALL samples from this study (red circles).

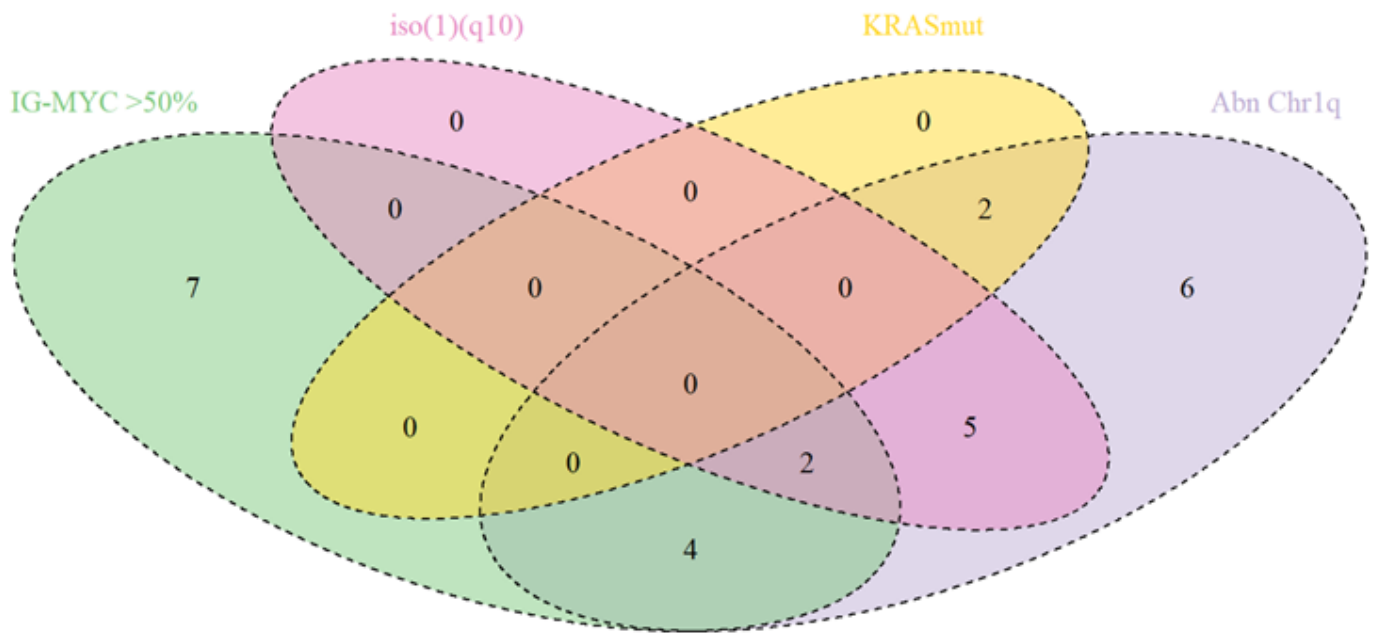

**Supplementary Figure 4. Venn diagram of the key molecular features identified within children with *IG-MYC-r* BCP-ALL.**

## Supplementary References

1. Schwalbe EC, Lindsey JC, Nakjang S, et al. Novel molecular subgroups for clinical classification and outcome prediction in childhood medulloblastoma: a cohort study. *Lancet Oncol.* 2017;18(7):958-971.
2. Bray, N.L., Pimentel, H., Melsted, P., and Pachter, L. Near-optimal probabilistic RNA-seq quantification. *Nature Biotechnology.* 2016;34(5):525-527.
3. Law, C.W., Chen, Y., Shi, W., and Smyth, G.K. Voom: precision weights unlock linear model analysis tools for RNA-seq read counts. *Genome Biology.* 2014;15:R29.
4. Parker, H.S., Leek, J.T., Favorov, A.V., et al. Preserving biological heterogeneity with a permuted surrogate variable analysis for genomics batch correction. *Bioinformatics.* 2014;30(19):2757-2763.
5. Newman AM, Zaka M, Zhou P, et al. Genomic abnormalities of *TP53* define distinct risk groups of paediatric B-cell non-Hodgkin lymphoma. *Leukemia.* 2022;36(3):781-789.
